# Supplementary material for: Synthesis, structural diversity, and methanol vapor adsorption properties of three Hg(II) halide complexes derived from a helical Schiff base
Source: Research Square preprint supplement (doi:10.21203/rs.3.rs-5731921/v1), 2025-01-01
Supplement: Supplementary file 1 [file 09b11a43a454479df75bce1d.docx]

**Supplementary Material**

**Synthesis, structural diversity, and methanol vapor adsorption properties of three Hg(II) halide complexes derived from a helical Schiff base**

Chao Huang, Tao Jiang, Ji-Hong Lu

(*Key Laboratory of Macrocyclic and Supramolecular Chemistry of Guizhou Province, Guizhou University, Guiyang 550025, China*)


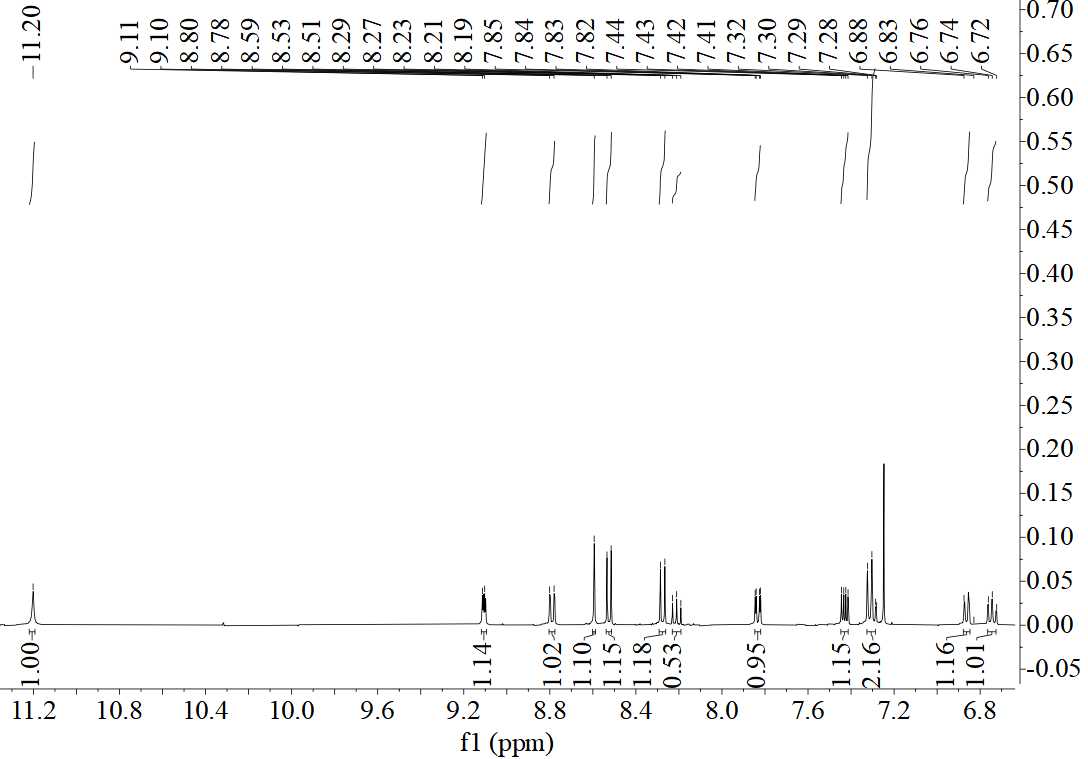


**Fig. S1.** 1H NMR forligand**L**


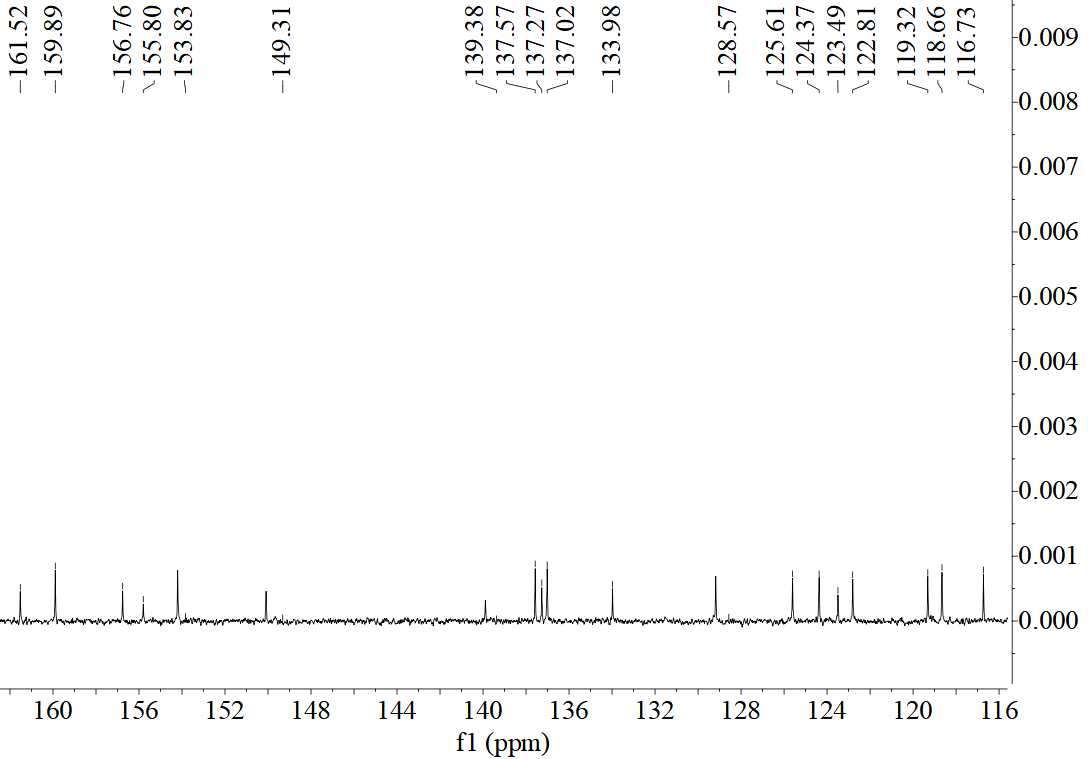


**Fig. S2.** 13C NMR forligand **L**

**Fig. S3.** IR spectra for ligand **L**

**Fig. S4.** IR spectra for complex **1**

**Fig. S5.** IR spectra for complex **2**

**Fig. S6.** IR spectra for complex **3**


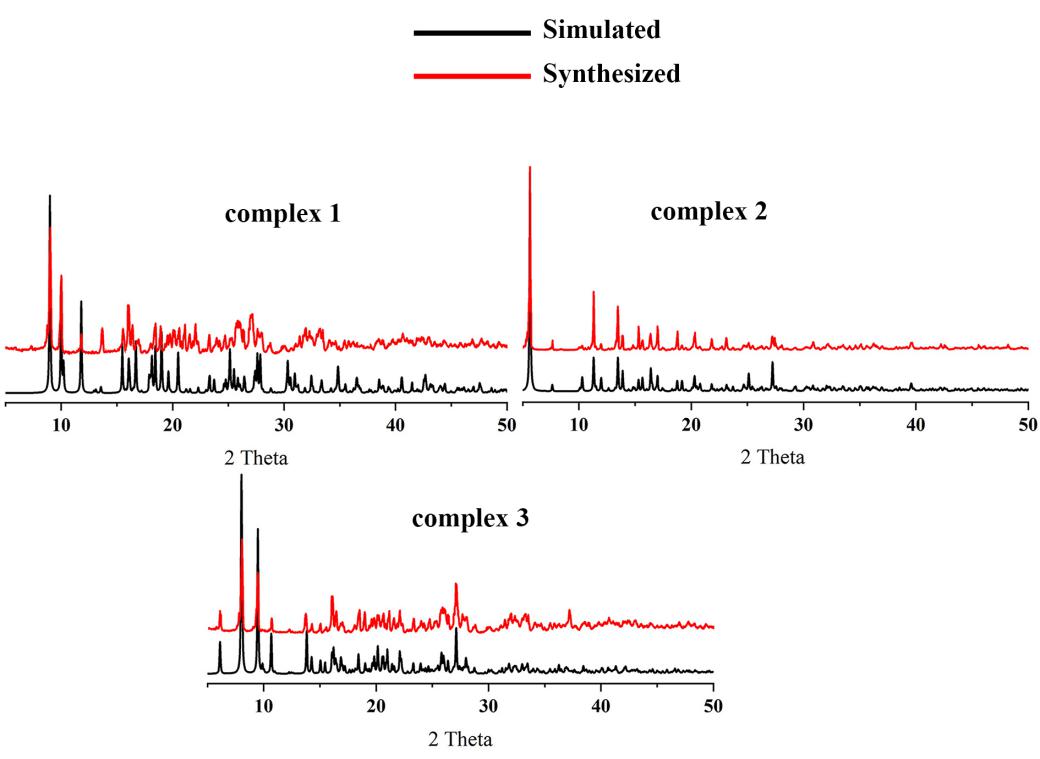


**Fig. S7.** PXRD patterns: synthesized and simulated from the single-crystal diffraction data

**Table S1.** Selected bond lengths (Å) and angles (°) for complexes **1**−**3**

| Complex **1** |  |  |  |  |  |
| --- | --- | --- | --- | --- | --- |
| Hg1−N1 | 2.512(5) | Hg1−I1 | 2.612(7) | Hg1−I2 | 2.635(6) |
| I1−Hg1−I2 | 147.56(2) | N1−Hg1−I2 | 104.79(12) | N1−Hg1−I1 | 97.76(12) |
| Complex **2** |  |  |  |  |  |
| Hg1−Br1 | 2.525(8) | Hg1−Br2 | 2.966(9) | Hg1−Br3 | 2.551(8) |
| Hg1−N1 | 2.282(5) | Hg2−Br2 | 2.671(8) | Hg2−Br3 | 2.840(8) |
| Hg2−Br4 | 2.539(8) | Hg2−N9 | 2.324(5) |  |  |
| Br1−Hg1−Br2 | 101.97(12) | Br1−Hg1−Br3 | 99.09(14) | Br3−Hg1−Br2 | 121.40(3) |
| N1−Hg1−Br1 | 148.16(12) | N1−Hg1−Br2 | 88.58(12) | N1−Hg1−Br3 | 73.46(13) |
| Br2−Hg2−Br3 | 90.44(2) | Br4−Hg2−Br3 | 112.15(3) | Br4−Hg2−Br2 | 125.34(3) |
| N9−Hg2−Br2 | 134.40(12) | N9−Hg2−Br3 | 96.56(13) | N9−Hg2−Br4 | 93.30(12) |
| Hg1−Br3−Hg2 | 91.97(2) | Hg2−Br2−Hg1 | 88.76(2) |  |  |
| Complex **3** |  |  |  |  |  |
| Hg1−Cl1 | 2.379(3) | Hg1−Cl2 | 2.402(2) | Hg1−N1 | 2.428(6) |
| Hg1−N8 | 2.650(6) |  |  |  |  |
| Cl1−Hg1−Cl2 | 152.04(9) | Cl1−Hg1−N8 | 91.86(16) | Cl1−Hg1−N1 | 99.82(17) |
| Cl2−Hg1−N1 | 102.37(17) | Cl2−Hg1−N8 | 90.33(15) | N1−Hg1−N8 | 122.7(2) |

**Table S2.** Hydrogen bonding distances (Å) and angles (°) for complexes **1**−**3**

|  | D−H⋅⋅⋅A | D−H (Å) | H⋅⋅⋅A (Å) | D⋅⋅⋅A (Å) | ∠DHA (°) |
| --- | --- | --- | --- | --- | --- |
| Complex **1** | C3−H3⋅⋅⋅O1 | 0.93 | 2.23 | 3.103(11) | 111 |
|  | C14−H14⋅⋅⋅O1 | 0.93 | 2.41 | 2.973(13) | 113 |
| Complex **2** | C3−H3⋅⋅⋅O2 | 0.93 | 2.49 | 3.345(8) | 153 |
|  | C14−H14⋅⋅⋅O1 | 0.93 | 2.30 | 2.898(9) | 122 |
|  | C24−H24⋅⋅⋅O2 | 0.93 | 2.37 | 2.937(8) | 119 |
|  | C35−H35⋅⋅⋅O1 | 0.93 | 2.38 | 3.224(10) | 151 |
| Complex **3** | C1−H1⋅⋅⋅N9 | 0.93 | 2.61 | 3.380(11) | 140 |
|  | C3−H3⋅⋅⋅O1 | 0.93 | 2.46 | 3.178(11) | 135 |
|  | C14−H14⋅⋅⋅O2 | 0.93 | 2.41 | 2.985(12) | 120 |
|  | C24−H24⋅⋅⋅O1 | 0.93 | 2.33 | 2.914(12) | 121 |
